# Supplementary material for: Fluorescence vs. Phosphorescence: Which Scenario Is Preferable in Au(I) Complexes with Benzothiadiazoles?
Source: MDPI journal article supplement (doi:10.3390/molecules27238162), 2022-11-23
Supplement: s1 [file s1]

## Supporting Information

### Fluorescence vs Phosphorescence: which scenario is preferable in Au(I) complexes with benzothiadiazoles?

R.M. Khisamov, A.A. Ryadun, S.N. Konchenko, T.S. Sukhikh\*

|                                                                                                                                                                                                                                                  |    |
|--------------------------------------------------------------------------------------------------------------------------------------------------------------------------------------------------------------------------------------------------|----|
| Figure S1. Simulated and experimental powder XRD patterns for compound <b>1</b> (Cu K $\alpha$ radiation). .....                                                                                                                                 | 2  |
| Figure S2. Simulated and experimental powder XRD patterns for compound <b>2a</b> (Cu K $\alpha$ radiation). .....                                                                                                                                | 2  |
| Figure S3. Simulated and experimental powder XRD patterns for compound <b>2b</b> (Cu K $\alpha$ radiation). .....                                                                                                                                | 2  |
| Table S1 – Vertical S <sub>0</sub> –S <sub>n</sub> (n = 1–10) transitions for <b>1</b> in the ground state .....                                                                                                                                 | 3  |
| Table S2 – Vertical S <sub>0</sub> –T <sub>n</sub> (n = 1–10) transitions for <b>1</b> in the ground state .....                                                                                                                                 | 3  |
| Table S3 – Vertical S <sub>0</sub> –S <sub>n</sub> (n = 1–10) transitions for <b>2a</b> in the ground state .....                                                                                                                                | 6  |
| Table S4 – Vertical S <sub>0</sub> –T <sub>n</sub> (n = 1–10) transitions for <b>2a</b> in the ground state .....                                                                                                                                | 7  |
| Table S5 – Vertical S <sub>0</sub> –S <sub>n</sub> (n = 1–10) transitions for <b>2b</b> in the ground state .....                                                                                                                                | 9  |
| Table S6 – Vertical S <sub>0</sub> –T <sub>n</sub> (n = 1–10) transitions for <b>2b</b> in the ground state .....                                                                                                                                | 10 |
| Figure S4. Frontier orbitals of S <sub>0</sub> equilibrium geometry of <b>1</b> .....                                                                                                                                                            | 12 |
| Figure S5. Frontier orbitals of S <sub>0</sub> equilibrium geometry of <b>2a</b> and <b>2b</b> .....                                                                                                                                             | 13 |
| Figure S6. UV-Vis, emission and excitation spectra of solids <b>1</b> , <b>2a</b> and <b>2b</b> .....                                                                                                                                            | 13 |
| Figure S7. UV-Vis, emission and excitation spectra of <b>2a</b> and <b>2b</b> in THF .....                                                                                                                                                       | 14 |
| Figure S8. Emission decay kinetics and single exponential fit for compound <b>1</b> .....                                                                                                                                                        | 14 |
| Figure S9. Emission decay kinetics and single exponential fit for compound <b>2a</b> .....                                                                                                                                                       | 15 |
| Figure S10. Emission decay kinetics and double exponential fit for compound <b>2b</b> .....                                                                                                                                                      | 15 |
| Figure S11. Decreasing intensity of the emission bands for compounds <b>1</b> and <b>2a</b> in the temperature range 77–300 K .....                                                                                                              | 16 |
| Table S7. Values of selected spin-orbit coupling matrix elements for the complexes. ....                                                                                                                                                         | 16 |
| Table S8. Values of selected spin-orbit coupling matrix elements for complex <b>1</b> at excited states geometries .....                                                                                                                         | 16 |
| Figure S12. Comparison of LUMO and HOMO orbitals of <b>1</b> in S <sub>0</sub> , S <sub>1</sub> , T <sub>1</sub> , and T <sub>2</sub> equilibrium geometries. ....                                                                               | 17 |
| Figure S13. Representation of energy levels for different geometry states (S <sub>0</sub> , S <sub>1</sub> , T <sub>1</sub> and T <sub>2</sub> ) of complexes <b>1–2</b> in the energy range from 0 to 30·10 <sup>3</sup> cm <sup>-1</sup> ..... | 17 |
| Figure S14. IR-spectra of compounds <b>1–2</b> recorded in KBr pellets .....                                                                                                                                                                     | 18 |
| Figure S15. Comparison of equilibrium geometries of complexes <b>1</b> , <b>2a</b> and <b>2b</b> in different states .....                                                                                                                       | 18 |
| Figure S16. Overlaid geometries for S <sub>1</sub> equilibrium state of <b>2b</b> obtained by two different DFT methods. ....                                                                                                                    | 18 |
| Table S9. Crystal data and structure refinement for the compounds. ....                                                                                                                                                                          | 19 |
| Table S10. Selected bond lengths for structures <b>1–2</b> . ....                                                                                                                                                                                | 19 |
| Table S11. Selected bond angles for structures <b>1–2</b> .....                                                                                                                                                                                  | 20 |

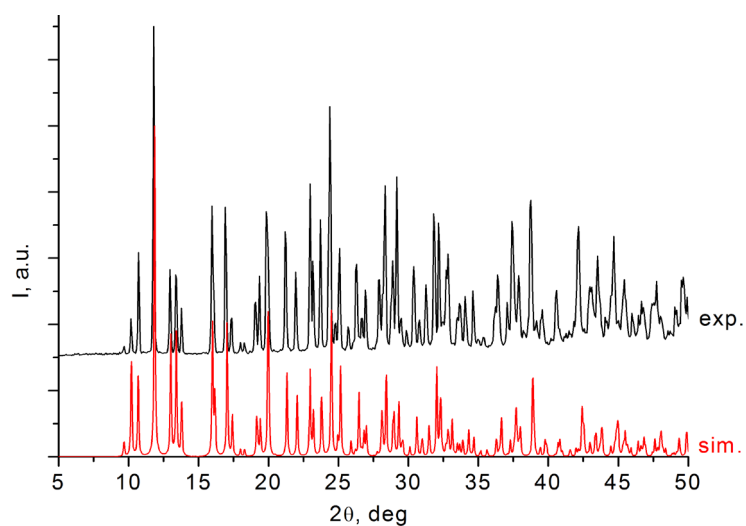

Figure S1. Simulated and experimental powder XRD patterns for compound **1** (Cu K $\alpha$  radiation).

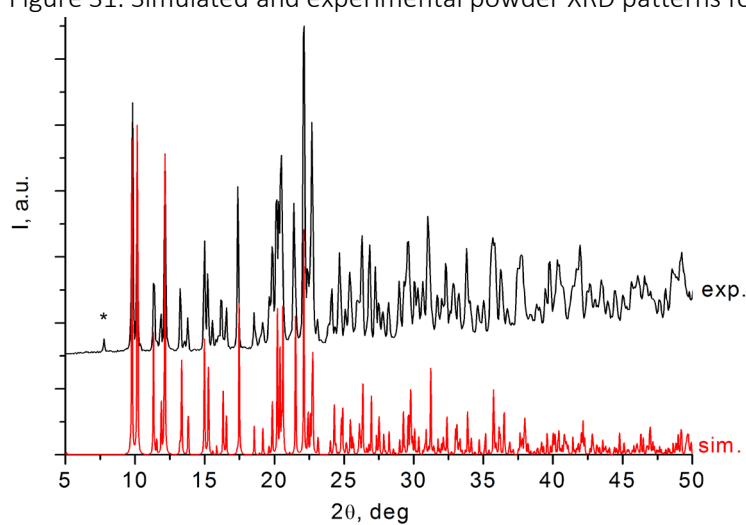

Figure S2. Simulated and experimental powder XRD patterns for compound **2a** (Cu K $\alpha$  radiation). Peak attributed to a very minor quantity of **2b** is highlighted by “\*”.

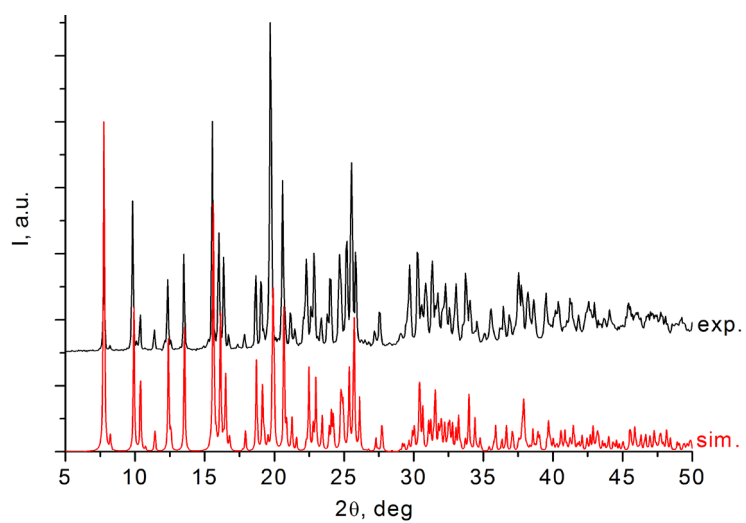

Figure S3. Simulated and experimental powder XRD patterns for compound **2b** (Cu K $\alpha$  radiation).

Table S1 – Vertical  $S_0-S_n$  ( $n = 1-10$ ) transitions for **1** in the ground state (TD-PBE0-D3BJ/def2-TZVP(-f))

| State | Energy, cm <sup>-1</sup> | Wavelength, nm | Oscillator strength | Transitions                                                   | Contributions                                            |
|-------|--------------------------|----------------|---------------------|---------------------------------------------------------------|----------------------------------------------------------|
| 1     | 25991.4                  | 384.7          | 0.094493292         | H → L                                                         | 0.982100                                                 |
| 2     | 31902.4                  | 313.5          | 0.007782581         | H → L + 1                                                     | 0.975042                                                 |
| 3     | 32655.4                  | 306.2          | 0.004235967         | H - 1 → L                                                     | 0.987044                                                 |
| 4     | 32879.1                  | 304.1          | 0.004122596         | H - 2 → L                                                     | 0.989941                                                 |
| 5     | 35359.3                  | 282.8          | 0.023497613         | H - 3 → L<br>H → L + 2                                        | 0.032822<br>0.930323                                     |
| 6     | 35949.5                  | 278.2          | 0.042800164         | H - 3 → L<br>H → L + 2<br>H → L + 5                           | 0.912618<br>0.034410<br>0.014070                         |
| 7     | 37164.6                  | 269.1          | 0.003285502         | H - 2 → L + 1<br>H - 1 → L + 1                                | 0.163619<br>0.799327                                     |
| 8     | 37326.2                  | 267.9          | 0.087819734         | H - 4 → L<br>H → L + 4<br>H → L + 5<br>H → L + 7<br>H → L + 9 | 0.786338<br>0.033176<br>0.086942<br>0.033368<br>0.010734 |
| 9     | 37682.3                  | 265.4          | 0.015908996         | H - 2 → L + 1<br>H - 1 → L + 1                                | 0.800502<br>0.163600                                     |
| 10    | 38244.8                  | 261.5          | 0.053996018         | H → L + 3<br>H → L + 4                                        | 0.911014<br>0.062411                                     |

Table S2 – Vertical  $S_0-T_n$  ( $n = 1-10$ ) transitions for **1** in the ground state (TDA-PBE0-D3BJ/def2-TZVP(-f))

| State | Energy, cm <sup>-1</sup> | Wavelength, nm | Transitions                                                                                      | Contributions                                                                                                                                                                                       |
|-------|--------------------------|----------------|--------------------------------------------------------------------------------------------------|-----------------------------------------------------------------------------------------------------------------------------------------------------------------------------------------------------|
| 1     | 18684.8                  | 535.2          | H - 9 → L<br>H → L                                                                               | 0.010633 (c= 0.10311461)<br>0.917438 (c= 0.95782991)                                                                                                                                                |
| 2     | 26994.8                  | 370.4          | H - 6 → L<br>H - 4 → L<br>H - 3 → L<br>H - 1 → L                                                 | 0.016917 (c= -0.13006692)<br>0.705779 (c= -0.84010642)<br>0.211080 (c= -0.45943457)<br>0.013973 (c= 0.11820715)                                                                                     |
| 3     | 30944.4                  | 323.2          | H - 13 → L<br>H - 9 → L<br>H - 5 → L + 1<br>H - 3 → L<br>H - 3 → L + 1<br>H → L + 1<br>H → L + 5 | 0.014882 (c= -0.12199138)<br>0.010935 (c= 0.10456840)<br>0.015091 (c= -0.12284598)<br>0.014558 (c= -0.12065808)<br>0.033013 (c= 0.18169347)<br>0.784469 (c= 0.88570247)<br>0.015244 (c= 0.12346626) |

|   |         |       |                           |                           |
|---|---------|-------|---------------------------|---------------------------|
| 4 | 31902.4 | 313.5 | H - 9 $\rightarrow$ L + 1 | 0.028168 (c= -0.16783316) |
|   |         |       | H - 9 $\rightarrow$ L + 2 | 0.067330 (c= -0.25948051) |
|   |         |       | H - 8 $\rightarrow$ L + 1 | 0.015903 (c= 0.12610895)  |
|   |         |       | H - 8 $\rightarrow$ L + 2 | 0.023720 (c= -0.15401222) |
|   |         |       | H - 7 $\rightarrow$ L + 4 | 0.026628 (c= -0.16318200) |
|   |         |       | H - 6 $\rightarrow$ L + 3 | 0.089239 (c= -0.29872874) |
|   |         |       | H - 6 $\rightarrow$ L + 4 | 0.062079 (c= 0.24915726)  |
|   |         |       | H - 5 $\rightarrow$ L + 1 | 0.148262 (c= 0.38504790)  |
|   |         |       | H - 5 $\rightarrow$ L + 2 | 0.050872 (c= 0.22554766)  |
|   |         |       | H - 3 $\rightarrow$ L + 1 | 0.148932 (c= -0.38591671) |
|   |         |       | H - 3 $\rightarrow$ L + 2 | 0.057452 (c= -0.23969089) |
|   |         |       | H - 2 $\rightarrow$ L     | 0.023477 (c= 0.15322317)  |
|   |         |       | H - 1 $\rightarrow$ L + 1 | 0.010649 (c= 0.10319436)  |
|   |         |       | H $\rightarrow$ L + 1     | 0.063729 (c= 0.25244597)  |
| 5 | 32341.2 | 309.2 | H - 13 $\rightarrow$ L    | 0.017358 (c= -0.13174937) |
|   |         |       | H - 9 $\rightarrow$ L + 1 | 0.035493 (c= 0.18839549)  |
|   |         |       | H - 8 $\rightarrow$ L     | 0.015806 (c= -0.12572003) |
|   |         |       | H - 8 $\rightarrow$ L + 1 | 0.124105 (c= 0.35228566)  |
|   |         |       | H - 8 $\rightarrow$ L + 2 | 0.024688 (c= -0.15712301) |
|   |         |       | H - 8 $\rightarrow$ L + 4 | 0.017115 (c= -0.13082471) |
|   |         |       | H - 7 $\rightarrow$ L + 2 | 0.010778 (c= 0.10381543)  |
|   |         |       | H - 7 $\rightarrow$ L + 3 | 0.066859 (c= -0.25857013) |
|   |         |       | H - 7 $\rightarrow$ L + 4 | 0.022506 (c= -0.15002140) |
|   |         |       | H - 6 $\rightarrow$ L + 4 | 0.029045 (c= -0.17042566) |
|   |         |       | H - 5 $\rightarrow$ L + 2 | 0.057844 (c= -0.24050724) |
|   |         |       | H - 4 $\rightarrow$ L     | 0.015258 (c= 0.12352259)  |
|   |         |       | H - 3 $\rightarrow$ L + 2 | 0.041104 (c= 0.20274094)  |
|   |         |       | H - 2 $\rightarrow$ L     | 0.197334 (c= 0.44422348)  |
|   |         |       | H - 1 $\rightarrow$ L     | 0.163197 (c= 0.40397604)  |
|   |         |       | H - 1 $\rightarrow$ L + 1 | 0.010211 (c= -0.10104796) |
| 6 | 32535.5 | 307.4 | H - 13 $\rightarrow$ L    | 0.015911 (c= 0.12613874)  |
|   |         |       | H - 9 $\rightarrow$ L     | 0.017875 (c= -0.13369790) |
|   |         |       | H - 9 $\rightarrow$ L + 1 | 0.014071 (c= 0.11862268)  |
|   |         |       | H - 8 $\rightarrow$ L + 1 | 0.129455 (c= 0.35979892)  |
|   |         |       | H - 8 $\rightarrow$ L + 2 | 0.025722 (c= -0.16038008) |
|   |         |       | H - 8 $\rightarrow$ L + 4 | 0.014265 (c= -0.11943805) |
|   |         |       | H - 7 $\rightarrow$ L + 2 | 0.015288 (c= 0.12364347)  |
|   |         |       | H - 7 $\rightarrow$ L + 3 | 0.061245 (c= -0.24747765) |
|   |         |       | H - 7 $\rightarrow$ L + 4 | 0.024738 (c= -0.15728404) |
|   |         |       | H - 6 $\rightarrow$ L + 4 | 0.014733 (c= -0.12138015) |
|   |         |       | H - 5 $\rightarrow$ L + 2 | 0.037869 (c= -0.19460063) |
|   |         |       | H - 4 $\rightarrow$ L     | 0.031085 (c= -0.17630993) |
|   |         |       | H - 3 $\rightarrow$ L     | 0.012701 (c= 0.11270063)  |
|   |         |       | H - 3 $\rightarrow$ L + 2 | 0.024800 (c= 0.15747900)  |
|   |         |       | H - 2 $\rightarrow$ L     | 0.192463 (c= -0.43870571) |
|   |         |       | H - 1 $\rightarrow$ L     | 0.202593 (c= -0.45010324) |
|   |         |       | H $\rightarrow$ L + 1     | 0.047320 (c= 0.21753263)  |

|    |         |       |                                                                                                                                                                                                                                                                                                                                                                                                                                                                    |                                                                                                                                                                                                                                                                                                                                                                                                                                                                                                                               |
|----|---------|-------|--------------------------------------------------------------------------------------------------------------------------------------------------------------------------------------------------------------------------------------------------------------------------------------------------------------------------------------------------------------------------------------------------------------------------------------------------------------------|-------------------------------------------------------------------------------------------------------------------------------------------------------------------------------------------------------------------------------------------------------------------------------------------------------------------------------------------------------------------------------------------------------------------------------------------------------------------------------------------------------------------------------|
| 7  | 32687.5 | 305.9 | H - 2 $\rightarrow$ L<br>H - 1 $\rightarrow$ L                                                                                                                                                                                                                                                                                                                                                                                                                     | 0.395822 (c= -0.62914387)<br>0.558561 (c= 0.74736944)                                                                                                                                                                                                                                                                                                                                                                                                                                                                         |
| 8  | 33545.4 | 298.1 | H - 17 $\rightarrow$ L<br>H - 16 $\rightarrow$ L<br>H - 13 $\rightarrow$ L<br>H - 12 $\rightarrow$ L<br>H - 9 $\rightarrow$ L<br>H - 8 $\rightarrow$ L<br>H - 7 $\rightarrow$ L<br>H - 5 $\rightarrow$ L<br>H - 4 $\rightarrow$ L<br>H - 3 $\rightarrow$ L<br>H - 2 $\rightarrow$ L<br>H - 1 $\rightarrow$ L<br>H $\rightarrow$ L + 1<br>H $\rightarrow$ L + 2<br>H $\rightarrow$ L + 5<br>H $\rightarrow$ L + 6<br>H $\rightarrow$ L + 8<br>H $\rightarrow$ L + 9 | 0.024004 (c= 0.15493069)<br>0.015549 (c= 0.12469607)<br>0.154157 (c= -0.39262803)<br>0.015975 (c= 0.12639410)<br>0.091876 (c= 0.30311043)<br>0.031985 (c= -0.17884238)<br>0.012006 (c= 0.10957331)<br>0.011758 (c= 0.10843530)<br>0.026293 (c= 0.16215238)<br>0.125419 (c= -0.35414516)<br>0.146619 (c= -0.38290803)<br>0.039709 (c= -0.19927069)<br>0.040428 (c= -0.20106771)<br>0.070254 (c= -0.26505393)<br>0.012077 (c= 0.10989693)<br>0.014386 (c= -0.11994237)<br>0.026263 (c= -0.16205773)<br>0.053090 (c= 0.23041308) |
| 9  | 34602.6 | 289.0 | H - 12 $\rightarrow$ L<br>H - 12 $\rightarrow$ L + 8<br>H - 12 $\rightarrow$ L + 9                                                                                                                                                                                                                                                                                                                                                                                 | 0.905087 (c= -0.95136042)<br>0.010232 (c= 0.10115372)<br>0.014920 (c= -0.12214720)                                                                                                                                                                                                                                                                                                                                                                                                                                            |
| 10 | 34910.1 | 286.4 | H - 13 $\rightarrow$ L<br>H - 9 $\rightarrow$ L<br>H - 7 $\rightarrow$ L + 1<br>H - 7 $\rightarrow$ L + 2<br>H - 6 $\rightarrow$ L + 1<br>H - 4 $\rightarrow$ L<br>H - 3 $\rightarrow$ L<br>H $\rightarrow$ L + 2                                                                                                                                                                                                                                                  | 0.012819 (c= -0.11322052)<br>0.012287 (c= 0.11084876)<br>0.010890 (c= 0.10435563)<br>0.015327 (c= -0.12380068)<br>0.030725 (c= 0.17528632)<br>0.017822 (c= 0.13350056)<br>0.038770 (c= -0.19690141)<br>0.777019 (c= 0.88148662)                                                                                                                                                                                                                                                                                               |

Table S3 – Vertical  $S_0$ – $S_n$  ( $n = 1$ – $10$ ) transitions for **2a** in the ground state (TD-PBE0-D3BJ/def2-TZVP(-f))

| State | Energy, cm <sup>-1</sup> | Wavelength, nm | Oscillator strength | Transitions                                                                                                                    | Contributions                                                                                                        |
|-------|--------------------------|----------------|---------------------|--------------------------------------------------------------------------------------------------------------------------------|----------------------------------------------------------------------------------------------------------------------|
| 1     | 25077.9                  | 398.8          | 0.099372434         | H → L                                                                                                                          | 0.982747                                                                                                             |
| 2     | 31090.0                  | 321.6          | 0.001508312         | H → L + 1<br>H → L + 2                                                                                                         | 0.969543<br>0.015382                                                                                                 |
| 3     | 33368.4                  | 299.7          | 0.015002746         | H → L + 1<br>H → L + 2                                                                                                         | 0.015390<br>0.971676                                                                                                 |
| 4     | 35135.9                  | 284.6          | 0.001394731         | H - 2 → L<br>H - 1 → L                                                                                                         | 0.421173<br>0.568399                                                                                                 |
| 5     | 35187.4                  | 284.2          | 0.000200988         | H - 2 → L<br>H - 1 → L                                                                                                         | 0.567817<br>0.427491                                                                                                 |
| 6     | 35454.4                  | 282.1          | 0.004228600         | H → L + 3<br>H → L + 4                                                                                                         | 0.753663<br>0.227395                                                                                                 |
| 7     | 35875.6                  | 278.7          | 0.012174478         | H - 5 → L<br>H - 4 → L<br>H - 3 → L<br>H → L + 3<br>H → L + 4<br>H → L + 5<br>H → L + 6                                        | 0.024197<br>0.018897<br>0.036375<br>0.192879<br>0.633515<br>0.024147<br>0.038656                                     |
| 8     | 36877.1                  | 271.2          | 0.034964954         | H - 5 → L<br>H - 4 → L<br>H - 3 → L<br>H → L + 4<br>H → L + 5<br>H → L + 6<br>H → L + 8                                        | 0.015452<br>0.021815<br>0.753294<br>0.069321<br>0.019278<br>0.040181<br>0.036999                                     |
| 9     | 37140.2                  | 269.2          | 0.013706441         | H - 3 → L<br>H → L + 5<br>H → L + 6                                                                                            | 0.089488<br>0.207455<br>0.681612                                                                                     |
| 10    | 37616.3                  | 265.8          | 0.057442744         | H - 6 → L<br>H - 5 → L<br>H - 4 → L<br>H - 3 → L<br>H → L + 4<br>H → L + 5<br>H → L + 6<br>H → L + 7<br>H → L + 8<br>H → L + 9 | 0.015618<br>0.257313<br>0.428207<br>0.085696<br>0.023838<br>0.018617<br>0.014811<br>0.017556<br>0.092361<br>0.011423 |

Table S4 – Vertical  $S_0-T_n$  ( $n = 1-10$ ) transitions for **2a** in the ground state (TDA-PBE0-D3BJ/def2-TZVP(-f))

| State | Energy, cm <sup>-1</sup> | Wavelength, nm | Transitions                                                                                                                                                                                                                                                                                                                                                                     | Contributions                                                                                                                                                                                                                                                                                                                                                                   |
|-------|--------------------------|----------------|---------------------------------------------------------------------------------------------------------------------------------------------------------------------------------------------------------------------------------------------------------------------------------------------------------------------------------------------------------------------------------|---------------------------------------------------------------------------------------------------------------------------------------------------------------------------------------------------------------------------------------------------------------------------------------------------------------------------------------------------------------------------------|
| 1     | 18056.1                  | 553.8          | H - 11 $\rightarrow$ L<br>H $\rightarrow$ L<br>H $\rightarrow$ L + 11                                                                                                                                                                                                                                                                                                           | 0.015391 (c= 0.12405968)<br>0.934472 (c= -0.96668102)<br>0.013682 (c= -0.11696919)                                                                                                                                                                                                                                                                                              |
| 2     | 27506.2                  | 363.6          | H - 11 $\rightarrow$ L<br>H - 6 $\rightarrow$ L<br>H - 5 $\rightarrow$ L<br>H - 4 $\rightarrow$ L<br>H - 3 $\rightarrow$ L                                                                                                                                                                                                                                                      | 0.010648 (c= 0.10319143)<br>0.027223 (c= -0.16499529)<br>0.510131 (c= -0.71423442)<br>0.272330 (c= -0.52185250)<br>0.142976 (c= -0.37812173)                                                                                                                                                                                                                                    |
| 3     | 30530.6                  | 327.5          | H - 10 $\rightarrow$ L + 2<br>H - 9 $\rightarrow$ L + 5<br>H - 8 $\rightarrow$ L + 3<br>H - 7 $\rightarrow$ L + 1<br>H - 6 $\rightarrow$ L + 1<br>H - 4 $\rightarrow$ L + 1<br>H - 3 $\rightarrow$ L + 1<br>H $\rightarrow$ L + 1<br>H $\rightarrow$ L + 2                                                                                                                      | 0.031353 (c= 0.17706665)<br>0.010447 (c= -0.10221107)<br>0.017067 (c= 0.13064006)<br>0.016472 (c= -0.12834204)<br>0.036620 (c= 0.19136278)<br>0.013702 (c= -0.11705633)<br>0.011838 (c= 0.10880166)<br>0.762307 (c= -0.87310173)<br>0.025665 (c= 0.16020175)                                                                                                                    |
| 4     | 31905.8                  | 313.4          | H - 12 $\rightarrow$ L + 2<br>H - 11 $\rightarrow$ L<br>H - 10 $\rightarrow$ L + 1<br>H - 9 $\rightarrow$ L + 3<br>H - 8 $\rightarrow$ L + 5<br>H - 7 $\rightarrow$ L + 2<br>H - 7 $\rightarrow$ L + 3<br>H - 6 $\rightarrow$ L + 1<br>H - 6 $\rightarrow$ L + 2<br>H - 4 $\rightarrow$ L + 2<br>H - 3 $\rightarrow$ L + 2<br>H $\rightarrow$ L + 1<br>H $\rightarrow$ L + 2    | 0.014133 (c= 0.11888309)<br>0.010474 (c= -0.10234444)<br>0.173398 (c= -0.41641111)<br>0.080672 (c= -0.28402785)<br>0.060440 (c= 0.24584521)<br>0.050875 (c= 0.22555408)<br>0.010189 (c= -0.10094094)<br>0.020409 (c= -0.14285936)<br>0.122619 (c= -0.35016980)<br>0.033604 (c= 0.18331512)<br>0.025935 (c= -0.16104218)<br>0.018216 (c= 0.13496780)<br>0.225290 (c= 0.47464747) |
| 5     | 32389.2                  | 308.7          | H - 12 $\rightarrow$ L + 1<br>H - 10 $\rightarrow$ L + 2<br>H - 9 $\rightarrow$ L + 5<br>H - 8 $\rightarrow$ L + 3<br>H - 7 $\rightarrow$ L + 1<br>H - 7 $\rightarrow$ L + 3<br>H - 6 $\rightarrow$ L + 1<br>H - 6 $\rightarrow$ L + 5<br>H - 4 $\rightarrow$ L + 1<br>H - 3 $\rightarrow$ L + 1<br>H - 1 $\rightarrow$ L + 1<br>H $\rightarrow$ L + 1<br>H $\rightarrow$ L + 4 | 0.018683 (c= -0.13668472)<br>0.123176 (c= 0.35096458)<br>0.055566 (c= -0.23572336)<br>0.083039 (c= 0.28816424)<br>0.049148 (c= -0.22169328)<br>0.012285 (c= 0.11083752)<br>0.156421 (c= 0.39550075)<br>0.018161 (c= -0.13476271)<br>0.028604 (c= -0.16912826)<br>0.049921 (c= 0.22343100)<br>0.014286 (c= 0.11952299)<br>0.177467 (c= 0.42126835)<br>0.015857 (c= 0.12592568)   |

|   |         |       |                                                                                                                                                                                                                                                                                                                                                                                                                                                                                                        |                                                                                                                                                                                                                                                                                                                                                                                                                                                                                                                                                           |
|---|---------|-------|--------------------------------------------------------------------------------------------------------------------------------------------------------------------------------------------------------------------------------------------------------------------------------------------------------------------------------------------------------------------------------------------------------------------------------------------------------------------------------------------------------|-----------------------------------------------------------------------------------------------------------------------------------------------------------------------------------------------------------------------------------------------------------------------------------------------------------------------------------------------------------------------------------------------------------------------------------------------------------------------------------------------------------------------------------------------------------|
| 6 | 32488.6 | 307.8 | $H - 7 \rightarrow L + 4$<br>$H - 6 \rightarrow L + 1$<br>$H - 6 \rightarrow L + 4$<br>$H - 6 \rightarrow L + 6$<br>$H - 6 \rightarrow L + 9$<br>$H - 5 \rightarrow L + 4$<br>$H - 5 \rightarrow L + 6$<br>$H - 4 \rightarrow L + 6$<br>$H - 3 \rightarrow L + 4$<br>$H - 3 \rightarrow L + 7$<br>$H - 2 \rightarrow L + 4$<br>$H - 1 \rightarrow L + 6$                                                                                                                                               | 0.011356 (c= -0.10656677)<br>0.011961 (c= -0.10936839)<br>0.061854 (c= -0.24870517)<br>0.031157 (c= 0.17651397)<br>0.013505 (c= -0.11621005)<br>0.026799 (c= -0.16370466)<br>0.105783 (c= -0.32524361)<br>0.129971 (c= 0.36051554)<br>0.334072 (c= 0.57798996)<br>0.017990 (c= -0.13412793)<br>0.017270 (c= 0.13141598)<br>0.010040 (c= 0.10020109)                                                                                                                                                                                                       |
| 7 | 32763.2 | 305.2 | $H - 19 \rightarrow L$<br>$H - 18 \rightarrow L$<br>$H - 12 \rightarrow L$<br>$H - 11 \rightarrow L$<br>$H - 10 \rightarrow L$<br>$H - 10 \rightarrow L + 1$<br>$H - 9 \rightarrow L$<br>$H - 8 \rightarrow L$<br>$H - 8 \rightarrow L + 5$<br>$H - 7 \rightarrow L$<br>$H - 6 \rightarrow L + 2$<br>$H - 5 \rightarrow L$<br>$H - 3 \rightarrow L$<br>$H \rightarrow L$<br>$H \rightarrow L + 2$<br>$H \rightarrow L + 4$<br>$H \rightarrow L + 8$<br>$H \rightarrow L + 9$<br>$H \rightarrow L + 11$ | 0.021590 (c= 0.14693459)<br>0.041844 (c= -0.20455912)<br>0.021070 (c= 0.14515375)<br>0.361799 (c= -0.60149749)<br>0.030625 (c= 0.17500063)<br>0.017997 (c= 0.13415296)<br>0.011014 (c= -0.10494885)<br>0.018185 (c= 0.13485172)<br>0.013995 (c= -0.11830186)<br>0.010249 (c= -0.10123929)<br>0.016001 (c= 0.12649518)<br>0.010282 (c= -0.10140093)<br>0.029372 (c= 0.17138313)<br>0.010413 (c= -0.10204169)<br>0.054508 (c= 0.23346851)<br>0.018666 (c= 0.13662257)<br>0.028429 (c= 0.16860841)<br>0.016437 (c= -0.12820733)<br>0.110105 (c= -0.33182146) |
| 8 | 33489.4 | 298.6 | $H - 11 \rightarrow L$<br>$H - 10 \rightarrow L + 1$<br>$H - 9 \rightarrow L + 3$<br>$H - 8 \rightarrow L + 5$<br>$H - 6 \rightarrow L + 2$<br>$H \rightarrow L + 1$<br>$H \rightarrow L + 2$<br>$H \rightarrow L + 4$<br>$H \rightarrow L + 6$<br>$H \rightarrow L + 8$                                                                                                                                                                                                                               | 0.054213 (c= -0.23283659)<br>0.030704 (c= -0.17522680)<br>0.028686 (c= -0.16937026)<br>0.026727 (c= 0.16348335)<br>0.022794 (c= -0.15097570)<br>0.012251 (c= -0.11068385)<br>0.637312 (c= -0.79831816)<br>0.027159 (c= 0.16480078)<br>0.011362 (c= 0.10659326)<br>0.025250 (c= 0.15890254)                                                                                                                                                                                                                                                                |
| 9 | 34400.2 | 290.7 | $H - 19 \rightarrow L$<br>$H - 18 \rightarrow L$<br>$H - 11 \rightarrow L$<br>$H \rightarrow L + 2$<br>$H \rightarrow L + 3$<br>$H \rightarrow L + 4$<br>$H \rightarrow L + 6$                                                                                                                                                                                                                                                                                                                         | 0.029131 (c= -0.17067738)<br>0.027403 (c= 0.16553911)<br>0.018433 (c= 0.13576823)<br>0.026337 (c= 0.16228638)<br>0.010930 (c= -0.10454669)<br>0.159880 (c= 0.39984946)<br>0.084629 (c= 0.29091027)                                                                                                                                                                                                                                                                                                                                                        |



|    |         |       |                                                                                                                             |                                                                                                                                             |
|----|---------|-------|-----------------------------------------------------------------------------------------------------------------------------|---------------------------------------------------------------------------------------------------------------------------------------------|
|    |         |       | H $\rightarrow$ L + 7<br>H $\rightarrow$ L + 8<br>H $\rightarrow$ L + 9<br>H $\rightarrow$ L + 11<br>H $\rightarrow$ L + 12 | 0.087418 (c= -0.29566532)<br>0.400590 (c= 0.63292142)<br>0.017085 (c= -0.13071074)<br>0.038992 (c= 0.19746361)<br>0.012312 (c= -0.11095741) |
| 10 | 34586.7 | 289.1 | H - 13 $\rightarrow$ L<br>H - 13 $\rightarrow$ L + 11<br>H - 12 $\rightarrow$ L                                             | 0.751403 (c= -0.86683514)<br>0.022772 (c= 0.15090510)<br>0.174561 (c= -0.41780491)                                                          |

Table S5 – Vertical  $S_0$ – $S_n$  ( $n = 1$ – $10$ ) transitions for **2b** in the ground state (TD-PBE0-D3BJ/def2-TZVP(-f))

| State | Energy, cm-1 | Wavelength, nm | Oscillator strength | Transitions                                                                                                                                                                                          | Contributions                                                                                |
|-------|--------------|----------------|---------------------|------------------------------------------------------------------------------------------------------------------------------------------------------------------------------------------------------|----------------------------------------------------------------------------------------------|
| 1     | 24367.9      | 410.4          | 0.093296026         | H $\rightarrow$ L                                                                                                                                                                                    | 0.983738                                                                                     |
| 2     | 32361.6      | 309.0          | 0.013422341         | H $\rightarrow$ L + 1                                                                                                                                                                                | 0.987182                                                                                     |
| 3     | 33674.8      | 297.0          | 0.005042399         | H $\rightarrow$ L + 2                                                                                                                                                                                | 0.983923                                                                                     |
| 4     | 33998.1      | 294.1          | 0.000174909         | H - 3 $\rightarrow$ L<br>H - 1 $\rightarrow$ L                                                                                                                                                       | 0.020807<br>0.971867                                                                         |
| 5     | 34118.5      | 293.1          | 0.000143744         | H - 4 $\rightarrow$ L<br>H - 3 $\rightarrow$ L<br>H - 2 $\rightarrow$ L                                                                                                                              | 0.016160<br>0.038600<br>0.939219                                                             |
| 6     | 34810.7      | 287.3          | 0.004917565         | H - 4 $\rightarrow$ L<br>H - 3 $\rightarrow$ L<br>H - 2 $\rightarrow$ L<br>H - 1 $\rightarrow$ L                                                                                                     | 0.020252<br>0.899836<br>0.047522<br>0.020673                                                 |
| 7     | 35539.6      | 281.4          | 0.004739834         | H $\rightarrow$ L + 3<br>H $\rightarrow$ L + 4<br>H $\rightarrow$ L + 5                                                                                                                              | 0.947827<br>0.023480<br>0.013067                                                             |
| 8     | 36011.1      | 277.7          | 0.012585593         | H - 4 $\rightarrow$ L<br>H - 3 $\rightarrow$ L<br>H $\rightarrow$ L + 8                                                                                                                              | 0.910673<br>0.029860<br>0.010070                                                             |
| 9     | 36915.5      | 270.9          | 0.022613247         | H - 6 $\rightarrow$ L<br>H - 5 $\rightarrow$ L<br>H - 4 $\rightarrow$ L<br>H $\rightarrow$ L + 3<br>H $\rightarrow$ L + 4<br>H $\rightarrow$ L + 5<br>H $\rightarrow$ L + 7<br>H $\rightarrow$ L + 8 | 0.360435<br>0.013996<br>0.035708<br>0.023386<br>0.367391<br>0.100809<br>0.022878<br>0.051428 |
| 10    | 37479.6      | 266.8          | 0.001282627         | H - 5 $\rightarrow$ L<br>H $\rightarrow$ L + 4                                                                                                                                                       | 0.962862<br>0.021467                                                                         |

Table S6 – Vertical  $S_0-T_n$  ( $n = 1-10$ ) transitions for **2b** in the ground state (TDA-PBE0-D3BJ/def2-TZVP(-f))

| State | Energy, cm <sup>-1</sup> | Wavelength, nm | Transitions                                                                                                                                                                                                                                                                                                                            | Contributions                                                                                                                                                                                                                                                                                                                                                                                                                                                                                                                                                                          |
|-------|--------------------------|----------------|----------------------------------------------------------------------------------------------------------------------------------------------------------------------------------------------------------------------------------------------------------------------------------------------------------------------------------------|----------------------------------------------------------------------------------------------------------------------------------------------------------------------------------------------------------------------------------------------------------------------------------------------------------------------------------------------------------------------------------------------------------------------------------------------------------------------------------------------------------------------------------------------------------------------------------------|
| 1     | 17594.5                  | 568.4          | H - 11 → L<br>H → L<br>H → L + 11                                                                                                                                                                                                                                                                                                      | 0.014124 (c= -0.11884594)<br>0.935783 (c= -0.96735878)<br>0.013670 (c= -0.11691752)                                                                                                                                                                                                                                                                                                                                                                                                                                                                                                    |
| 2     | 27349.0                  | 365.6          | H - 11 → L<br>H - 6 → L<br>H - 4 → L<br>H - 3 → L                                                                                                                                                                                                                                                                                      | 0.010174 (c= -0.10086628)<br>0.859386 (c= -0.92703051)<br>0.070182 (c= -0.26491840)<br>0.013551 (c= -0.11640871)                                                                                                                                                                                                                                                                                                                                                                                                                                                                       |
| 3     | 31527.6                  | 317.2          | H - 10 → L + 1<br>H - 9 → L + 3<br>H - 9 → L + 5<br>H - 5 → L + 1<br>H - 5 → L + 2<br>H - 4 → L + 1<br>H - 4 → L + 2<br>H - 3 → L + 2<br>H → L + 1                                                                                                                                                                                     | 0.107595 (c= -0.32801634)<br>0.046255 (c= -0.21507045)<br>0.010413 (c= -0.10204213)<br>0.037735 (c= -0.19425617)<br>0.048696 (c= 0.22067107)<br>0.010132 (c= 0.10065818)<br>0.010970 (c= -0.10473612)<br>0.026889 (c= 0.16397937)<br>0.542336 (c= 0.73643452)                                                                                                                                                                                                                                                                                                                          |
| 4     | 31702.3                  | 315.4          | H - 14 → L + 2<br>H - 10 → L + 2<br>H - 9 → L + 2<br>H - 9 → L + 5<br>H - 8 → L + 3<br>H - 8 → L + 4<br>H - 8 → L + 5<br>H - 8 → L + 6<br>H - 7 → L + 1<br>H - 7 → L + 2<br>H - 5 → L + 1<br>H - 5 → L + 2<br>H - 4 → L + 1<br>H - 4 → L + 2<br>H - 3 → L + 1<br>H - 3 → L + 2<br>H - 1 → L + 2<br>H → L + 1<br>H → L + 2<br>H → L + 3 | 0.014598 (c= 0.12082307)<br>0.100599 (c= 0.31717317)<br>0.012345 (c= 0.11110817)<br>0.012501 (c= -0.11181007)<br>0.071204 (c= -0.26684070)<br>0.045671 (c= 0.21370822)<br>0.024985 (c= 0.15806766)<br>0.011319 (c= -0.10639256)<br>0.015903 (c= 0.12610695)<br>0.055871 (c= 0.23637134)<br>0.068874 (c= -0.26243887)<br>0.070674 (c= -0.26584612)<br>0.028387 (c= 0.16848507)<br>0.045274 (c= 0.21277717)<br>0.041061 (c= -0.20263391)<br>0.112287 (c= -0.33509290)<br>0.018613 (c= -0.13642815)<br>0.022644 (c= 0.15048027)<br>0.040489 (c= -0.20121949)<br>0.011114 (c= -0.10542513) |
| 5     | 32385.8                  | 308.8          | H - 9 → L + 6<br>H - 7 → L + 4<br>H - 5 → L + 4<br>H - 5 → L + 6<br>H - 4 → L + 4<br>H - 4 → L + 5<br>H - 4 → L + 6<br>H - 3 → L + 1<br>H - 3 → L + 3                                                                                                                                                                                  | 0.014713 (c= 0.12129552)<br>0.018323 (c= -0.13536343)<br>0.066675 (c= -0.25821439)<br>0.072595 (c= -0.26943385)<br>0.026340 (c= 0.16229647)<br>0.104959 (c= -0.32397322)<br>0.152378 (c= -0.39035681)<br>0.014251 (c= 0.11937591)<br>0.031606 (c= 0.17778059)                                                                                                                                                                                                                                                                                                                          |

|    |         |       |                                                                                                                                                                                                                                                                                                                                                                                                                                                     |                                                                                                                                                                                                                                                                                                                                                                                                                                                                      |
|----|---------|-------|-----------------------------------------------------------------------------------------------------------------------------------------------------------------------------------------------------------------------------------------------------------------------------------------------------------------------------------------------------------------------------------------------------------------------------------------------------|----------------------------------------------------------------------------------------------------------------------------------------------------------------------------------------------------------------------------------------------------------------------------------------------------------------------------------------------------------------------------------------------------------------------------------------------------------------------|
|    |         |       | $H - 3 \rightarrow L + 4$<br>$H - 3 \rightarrow L + 5$<br>$H - 3 \rightarrow L + 8$<br>$H - 1 \rightarrow L + 4$                                                                                                                                                                                                                                                                                                                                    | 0.196203 (c= 0.44294783)<br>0.083504 (c= -0.28897044)<br>0.010503 (c= -0.10248545)<br>0.011433 (c= -0.10692503)                                                                                                                                                                                                                                                                                                                                                      |
| 6  | 32479.5 | 307.9 | $H - 19 \rightarrow L$<br>$H - 18 \rightarrow L$<br>$H - 14 \rightarrow L$<br>$H - 11 \rightarrow L$<br>$H - 10 \rightarrow L$<br>$H - 10 \rightarrow L + 1$<br>$H - 9 \rightarrow L + 3$<br>$H - 8 \rightarrow L$<br>$H - 6 \rightarrow L$<br>$H - 5 \rightarrow L + 1$<br>$H - 5 \rightarrow L + 2$<br>$H - 3 \rightarrow L$<br>$H \rightarrow L + 1$<br>$H \rightarrow L + 2$<br>$H \rightarrow L + 8$<br>$H \rightarrow L + 11$                 | 0.044525 (c= -0.21101036)<br>0.011330 (c= -0.10644128)<br>0.046687 (c= -0.21607266)<br>0.283669 (c= 0.53260608)<br>0.029495 (c= 0.17174184)<br>0.050092 (c= 0.22381327)<br>0.027678 (c= 0.16636752)<br>0.012451 (c= -0.11158281)<br>0.010210 (c= -0.10104290)<br>0.024996 (c= 0.15810222)<br>0.017158 (c= -0.13099039)<br>0.026317 (c= 0.16222439)<br>0.040579 (c= 0.20144211)<br>0.056659 (c= 0.23803089)<br>0.036128 (c= 0.19007345)<br>0.076510 (c= -0.27660385)  |
| 7  | 32907.1 | 303.9 | $H - 19 \rightarrow L$<br>$H - 14 \rightarrow L$<br>$H - 11 \rightarrow L$<br>$H - 11 \rightarrow L + 1$<br>$H - 10 \rightarrow L$<br>$H - 10 \rightarrow L + 1$<br>$H - 9 \rightarrow L + 2$<br>$H - 9 \rightarrow L + 3$<br>$H - 9 \rightarrow L + 5$<br>$H - 5 \rightarrow L + 1$<br>$H - 5 \rightarrow L + 2$<br>$H - 4 \rightarrow L + 1$<br>$H - 3 \rightarrow L$<br>$H \rightarrow L + 1$<br>$H \rightarrow L + 8$<br>$H \rightarrow L + 11$ | 0.010497 (c= -0.10245411)<br>0.016764 (c= -0.12947510)<br>0.093416 (c= 0.30564021)<br>0.027674 (c= 0.16635471)<br>0.019225 (c= 0.13865532)<br>0.074792 (c= -0.27348093)<br>0.010954 (c= 0.10466217)<br>0.058215 (c= -0.24127884)<br>0.019601 (c= -0.14000471)<br>0.046206 (c= -0.21495543)<br>0.026314 (c= 0.16221459)<br>0.013278 (c= 0.11522905)<br>0.011540 (c= 0.10742283)<br>0.369421 (c= -0.60780009)<br>0.019943 (c= 0.14121963)<br>0.010925 (c= -0.10452221) |
| 8  | 33549.6 | 298.1 | $H - 11 \rightarrow L$<br>$H - 8 \rightarrow L + 2$<br>$H - 1 \rightarrow L$<br>$H \rightarrow L + 2$                                                                                                                                                                                                                                                                                                                                               | 0.018971 (c= -0.13773402)<br>0.016156 (c= 0.12710559)<br>0.013447 (c= 0.11596240)<br>0.849691 (c= 0.92178705)                                                                                                                                                                                                                                                                                                                                                        |
| 9  | 34015.6 | 294.0 | $H - 3 \rightarrow L$<br>$H - 2 \rightarrow L$<br>$H - 1 \rightarrow L$<br>$H \rightarrow L + 8$                                                                                                                                                                                                                                                                                                                                                    | 0.013183 (c= -0.11481549)<br>0.028362 (c= -0.16841160)<br>0.888624 (c= 0.94266876)<br>0.020285 (c= 0.14242367)                                                                                                                                                                                                                                                                                                                                                       |
| 10 | 34094.9 | 293.3 | $H - 4 \rightarrow L$<br>$H - 3 \rightarrow L$                                                                                                                                                                                                                                                                                                                                                                                                      | 0.016353 (c= 0.12788041)<br>0.032695 (c= 0.18081668)                                                                                                                                                                                                                                                                                                                                                                                                                 |

|  |  |  |                       |                          |
|--|--|--|-----------------------|--------------------------|
|  |  |  | H - 2 $\rightarrow$ L | 0.849365 (c= 0.92160989) |
|  |  |  | H - 1 $\rightarrow$ L | 0.038213 (c= 0.19548225) |

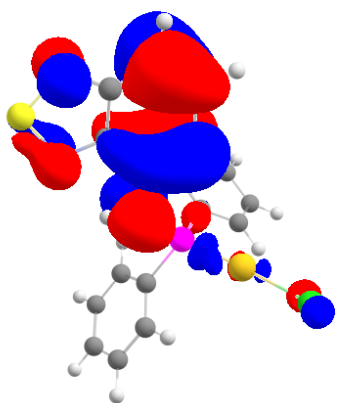

HOMO

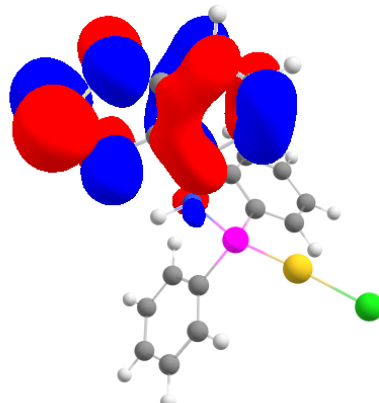

LUMO

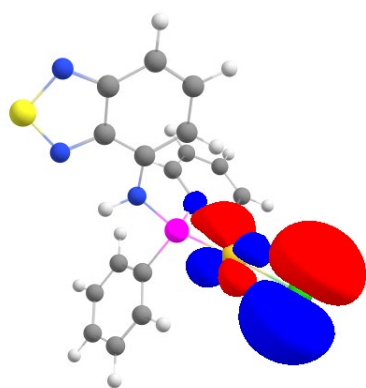

HOMO-1

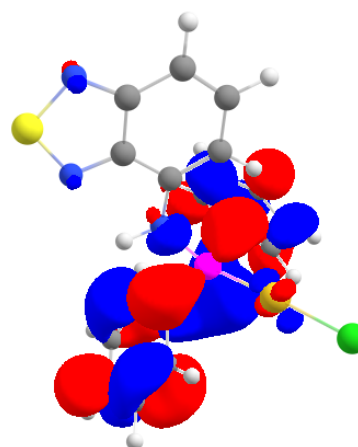

LUMO+1

Figure S4. Frontier orbitals of  $S_0$  equilibrium geometry of **1** (TD-PBE0-D3BJ/def2-TZVP(-f))

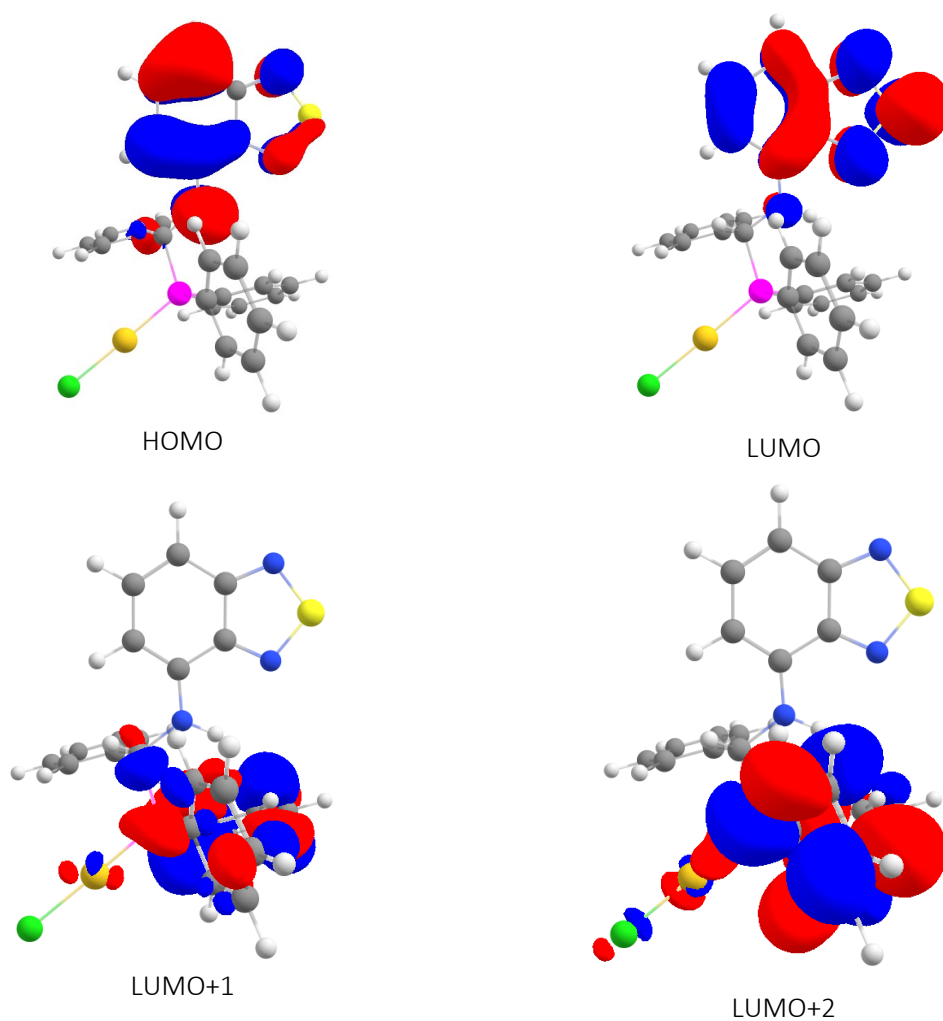

Figure S5. Frontier orbitals of  $S_0$  equilibrium geometry of **2a** and **2b** on the example of the latter (TD-PBE0-D3BJ/def2-TZVP(-f))

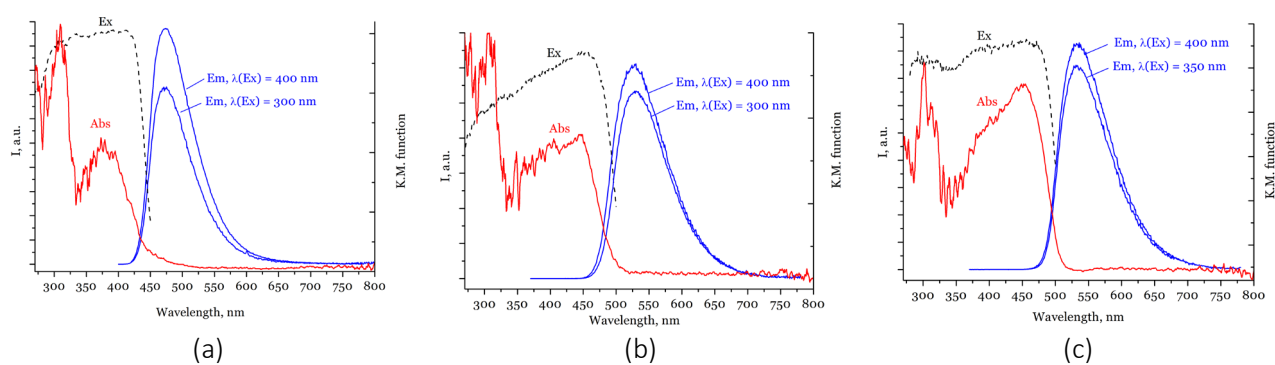

Figure S6. UV-Vis (red line), emission (blue lines; at different excitation wavelengths) and excitation (dashed black line) spectra of solids **1** (a), **2a** (b) and **2b** (c).

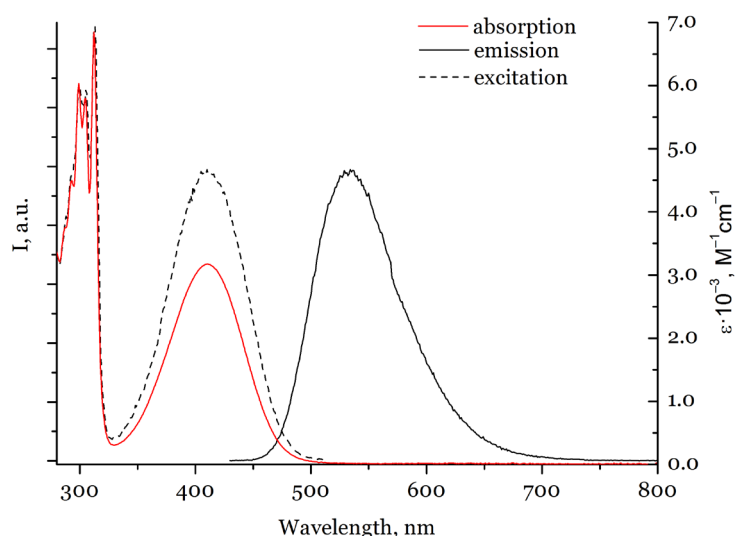

Figure S7. UV-Vis (red line), emission (solid black line; excitation wavelength 410 nm) and excitation (dashed black line) spectra of **2a** and **2b** in THF ( $3 \cdot 10^{-5}$  M) on the example of the former.

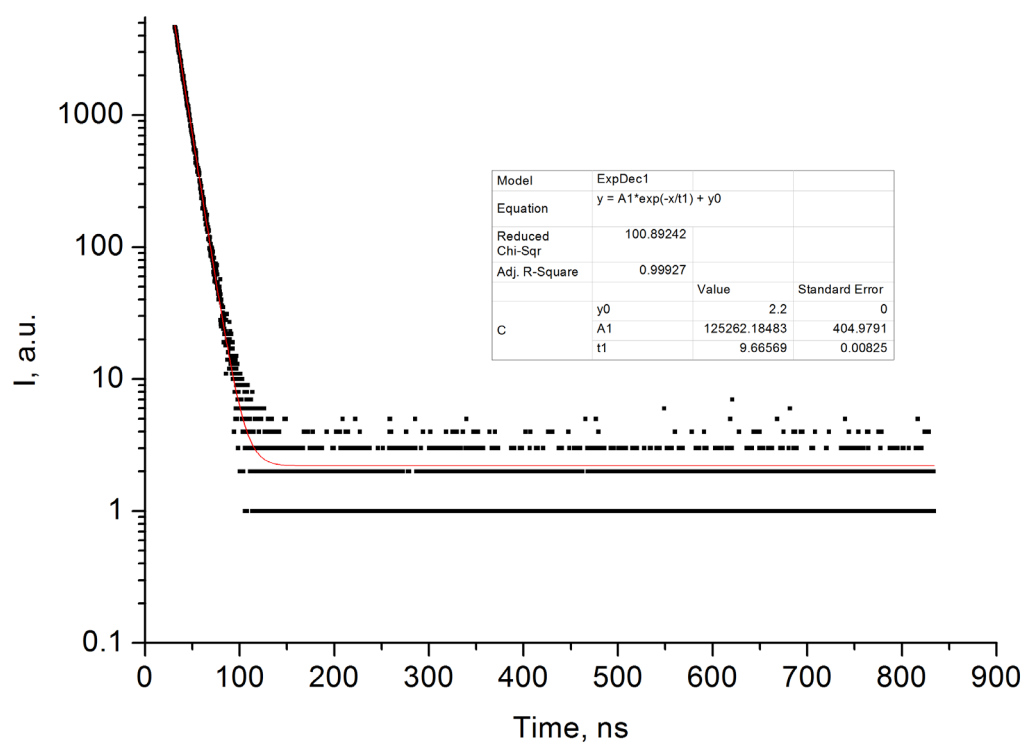

Figure S8. Emission decay kinetics (black dots) and single exponential fit (red line) for compound **1** (excitation wavelength 350 nm).

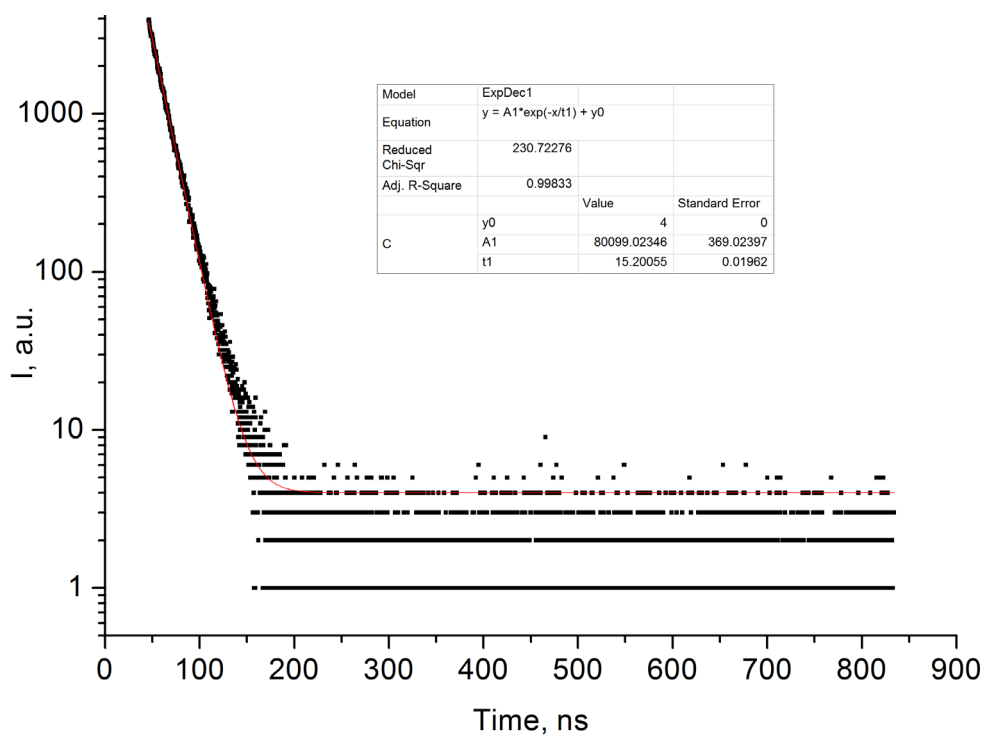

Figure S9. Emission decay kinetics (black dots) and single exponential fit (red line) for compound **2a** (excitation wavelength 350 nm).

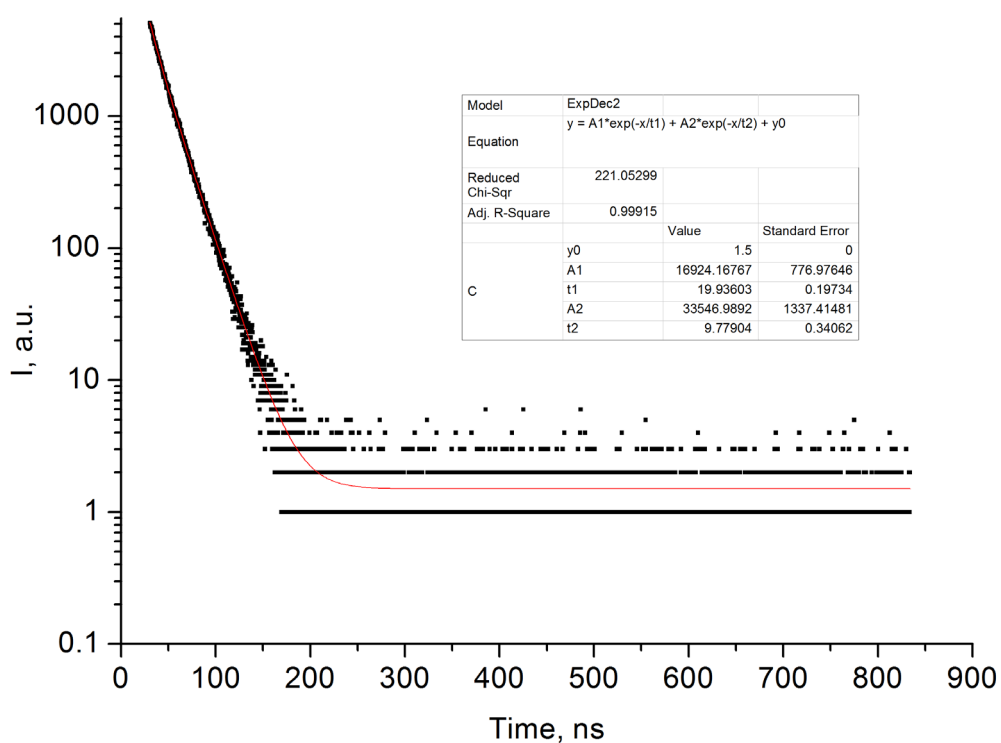

Figure S10. Emission decay kinetics (black dots) and double exponential fit (red line) for compound **2b** (excitation wavelength 350 nm).

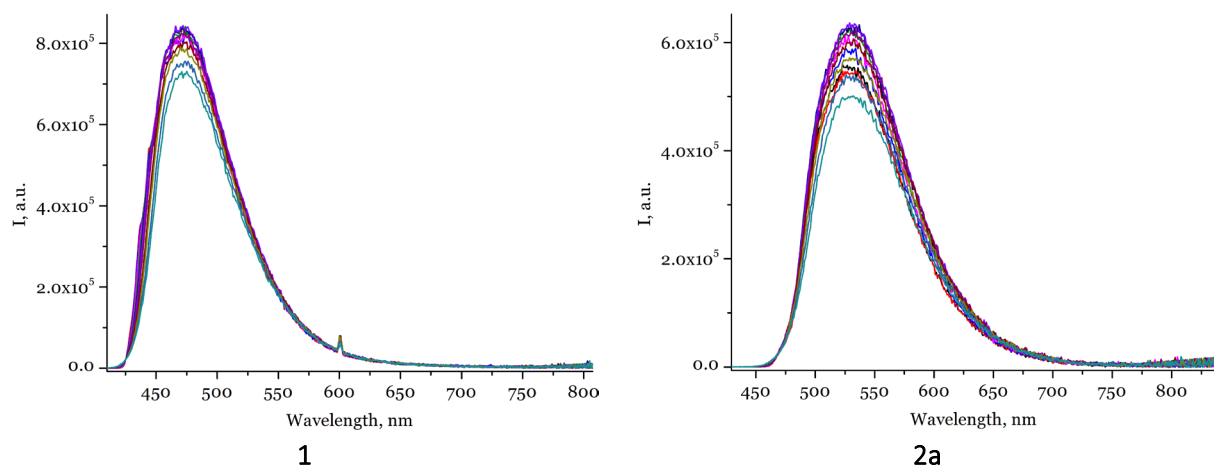

Figure S11. Decreasing intensity of the emission bands for compounds **1** and **2a** in the temperature range 77–300 K at the excitation wavelength 300nm. A minor artefact at 600 nm for **1** is the second order Rayleigh scattering from the lamp. In the case of **2a**, it is hidden by the band of the compound.

Table S7. Values of selected spin-orbit coupling matrix elements for the complexes ( $\text{cm}^{-1}$ ).

|                                      | <b>1</b> | <b>2a</b> | <b>2b</b> |
|--------------------------------------|----------|-----------|-----------|
| $\langle T_1   H_{SO}   S_0 \rangle$ | 16.8791  | 1.2554    | 2.0460    |
| $\langle T_1   H_{SO}   S_1 \rangle$ | 9.48840  | 0.3332    | 1.1093    |
| $\langle T_1   H_{SO}   S_2 \rangle$ | 23.0954  | 11.985    | 5.3687    |
| $\langle T_2   H_{SO}   S_0 \rangle$ | 16.1255  | 1.3537    | 0.8841    |
| $\langle T_2   H_{SO}   S_1 \rangle$ | 19.6617  | 1.0208    | 2.1309    |
| $\langle T_2   H_{SO}   S_2 \rangle$ | 5.31946  | 4.1497    | 1.2577    |

Table S8. Values of selected spin-orbit coupling matrix elements for complex **1** at excited states geometries ( $\text{cm}^{-1}$ ).

|                                      | $S_1$   | $T_1$   | $T_2$    |
|--------------------------------------|---------|---------|----------|
| $\langle T_1   H_{SO}   S_0 \rangle$ | 8.7789  | 9.7679  | 3.748506 |
| $\langle T_1   H_{SO}   S_1 \rangle$ | 4.0828  | 5.0321  | 11.27082 |
| $\langle T_2   H_{SO}   S_0 \rangle$ | 8.1901  | 13.6058 | 36.88823 |
| $\langle T_2   H_{SO}   S_1 \rangle$ | 11.3834 | 16.0571 | 36.93803 |



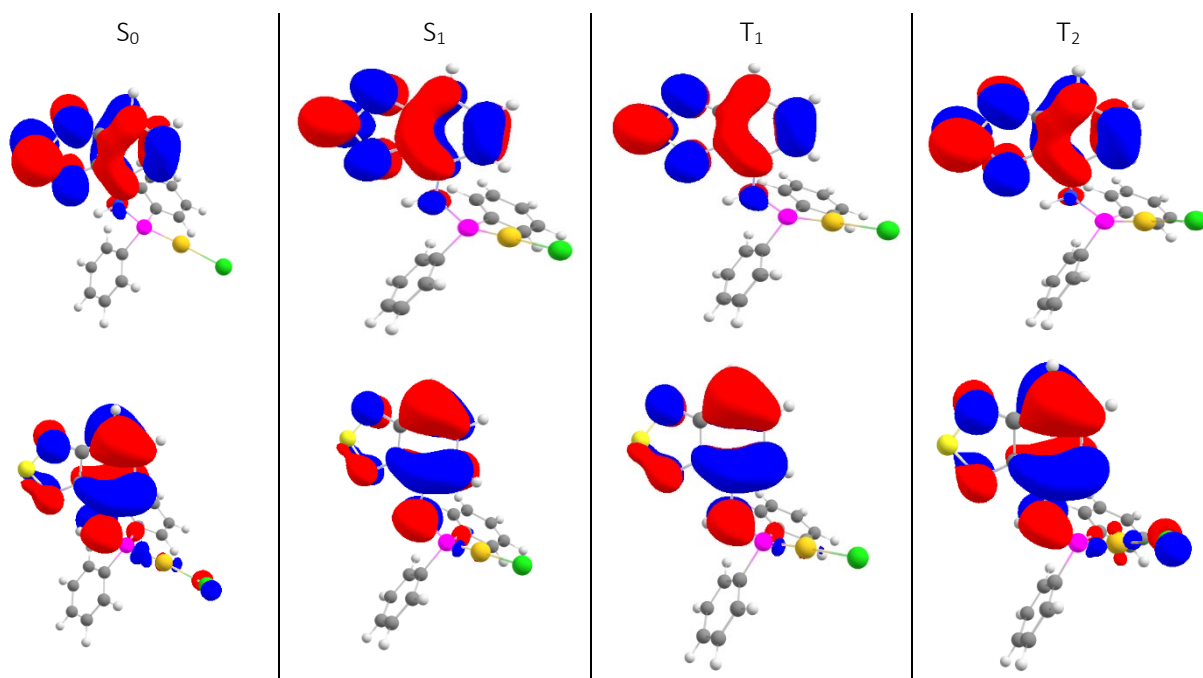

Figure S12. Comparison of LUMO (top) and HOMO (bottom) orbitals of **1** in  $S_0$ ,  $S_1$ ,  $T_1$ , and  $T_2$  equilibrium geometries.

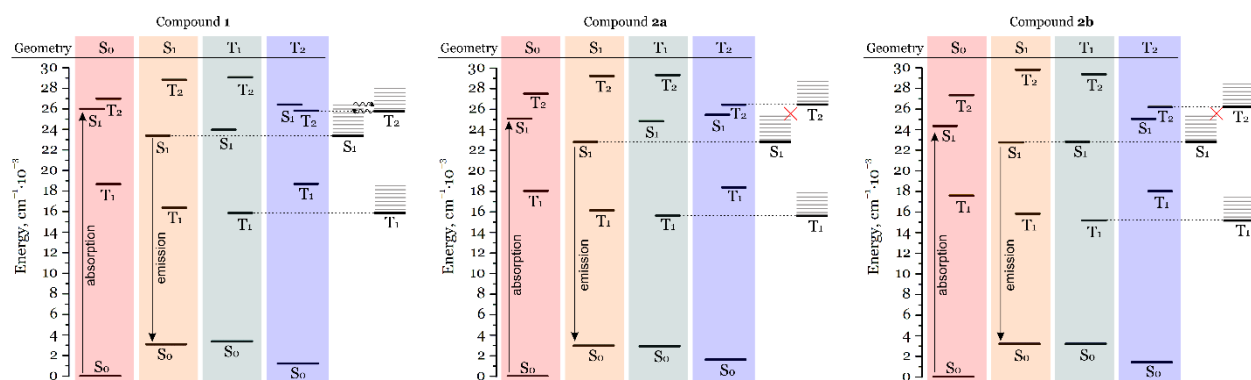

Figure S13. Representation of energy levels for different geometry states ( $S_0$ ,  $S_1$ ,  $T_1$  and  $T_2$ ) of complexes **1–2** in the energy range from 0 to  $30 \cdot 10^3 \text{ cm}^{-1}$ .

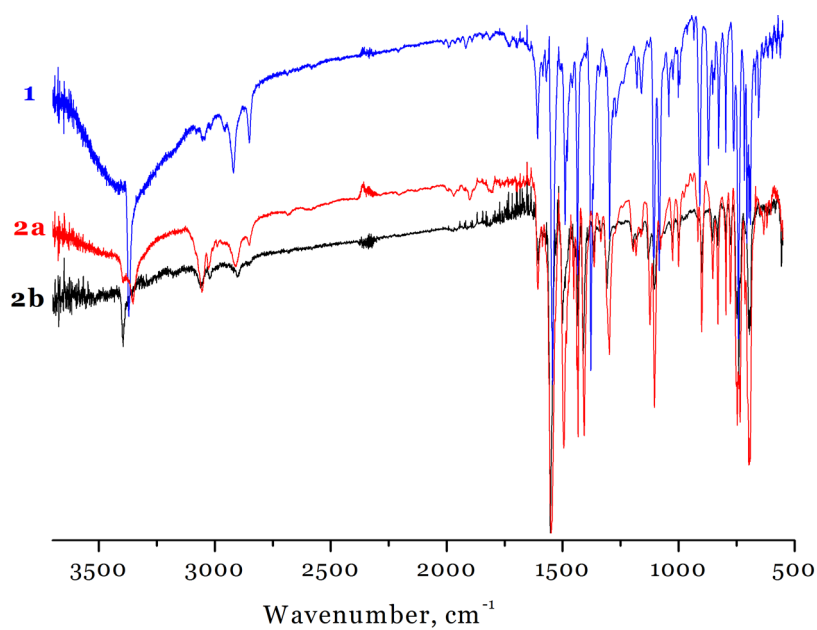

Figure S14. IR-spectra of compounds **1–2** recorded in KBr pellets

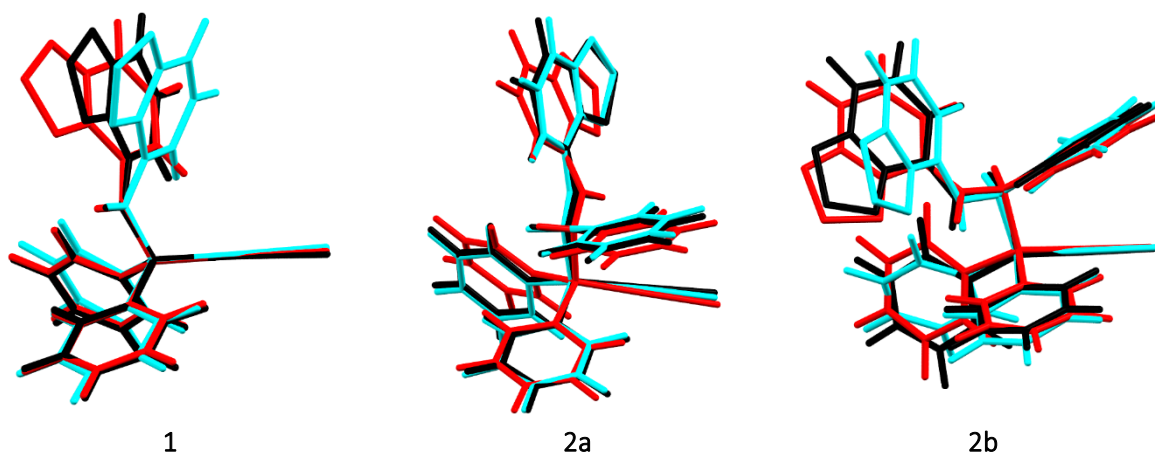

Figure S15. Comparison of equilibrium geometries of complexes **1**, **2a** and **2b** in different states. Black –  $S_0$  state, red –  $S_1$  state, blue –  $T_2$  state.

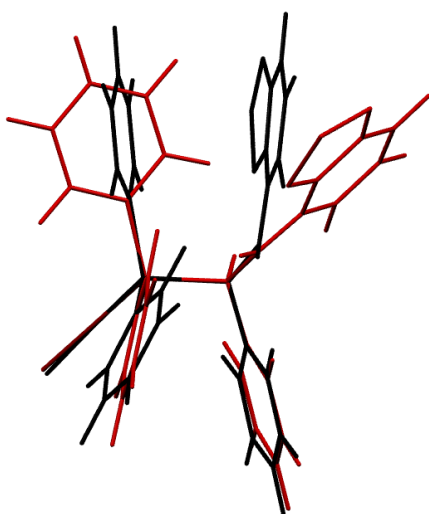

Figure S16. Overlaid geometries for  $S_1$  equilibrium state of **2b** obtained by two different DFT methods. Black – PBE0-D3BJ/def2-TZVP(-f), red – BHandHLYP-D3BJ/def2-TZVP(-f)

Table S9. Crystal data and structure refinement for the compounds.

| Identification code                                          | <b>1</b>                                                                     | <b>2a</b>                                                                    | <b>2b</b>                                                                     |
|--------------------------------------------------------------|------------------------------------------------------------------------------|------------------------------------------------------------------------------|-------------------------------------------------------------------------------|
| Empirical formula                                            | C <sub>18</sub> H <sub>14</sub> AuClN <sub>3</sub> PS                        | C <sub>25</sub> H <sub>20</sub> AuClN <sub>3</sub> PS                        | C <sub>25</sub> H <sub>20</sub> AuClN <sub>3</sub> PS                         |
| Formula weight                                               | 567.77                                                                       | 657.89                                                                       | 657.89                                                                        |
| Temperature/K                                                | 150(2)                                                                       | 150(2)                                                                       | 150(2)                                                                        |
| Space group                                                  | <i>P</i> 2 <sub>1</sub> 2 <sub>1</sub> 2 <sub>1</sub>                        | <i>C</i> 2/ <i>c</i>                                                         | <i>C</i> 2/ <i>c</i>                                                          |
| <i>a</i> /Å                                                  | 10.1692(3)                                                                   | 34.9108(9)                                                                   | 22.1095(9)                                                                    |
| <i>b</i> /Å                                                  | 10.9529(3)                                                                   | 9.3689(2)                                                                    | 9.2709(5)                                                                     |
| <i>c</i> /Å                                                  | 16.5364(5)                                                                   | 14.9285(4)                                                                   | 23.4135(9)                                                                    |
| $\beta$ /°                                                   | 90                                                                           | 94.9730(10)                                                                  | 103.4380(10)                                                                  |
| Volume/Å <sup>3</sup>                                        | 1841.86(9)                                                                   | 4864.4(2)                                                                    | 4667.8(4)                                                                     |
| <i>Z</i>                                                     | 4                                                                            | 8                                                                            | 8                                                                             |
| $\rho_{\text{calc}}$ /g/cm <sup>3</sup>                      | 2.047                                                                        | 1.797                                                                        | 1.872                                                                         |
| $\mu$ /mm <sup>-1</sup>                                      | 8.338                                                                        | 6.328                                                                        | 6.595                                                                         |
| <i>F</i> (000)                                               | 1080.0                                                                       | 2544.0                                                                       | 2544.0                                                                        |
| Crystal size/mm <sup>3</sup>                                 | 0.14 × 0.12 × 0.09                                                           | 0.08 × 0.06 × 0.04                                                           | 0.09 × 0.06 × 0.05                                                            |
| Radiation                                                    | MoK $\alpha$ ( $\lambda$ = 0.71073)                                          | MoK $\alpha$ ( $\lambda$ = 0.71073)                                          | MoK $\alpha$ ( $\lambda$ = 0.71073)                                           |
| 2 $\theta$ range for data collection/°                       | 4.46 to 61.04                                                                | 2.342 to 54.264                                                              | 3.788 to 54.28                                                                |
| Index ranges                                                 | -14 ≤ <i>h</i> ≤ 14, -15 ≤ <i>k</i> ≤ 14, -23 ≤ <i>l</i> ≤ 23                | -44 ≤ <i>h</i> ≤ 44, 0 ≤ <i>k</i> ≤ 12, 0 ≤ <i>l</i> ≤ 19                    | -28 ≤ <i>h</i> ≤ 27, -11 ≤ <i>k</i> ≤ 11, -30 ≤ <i>l</i> ≤ 30                 |
| Reflections collected                                        | 47766                                                                        | 5377                                                                         | 17773                                                                         |
| Independent reflections                                      | 5642 [ <i>R</i> <sub>int</sub> = 0.0491, <i>R</i> <sub>sigma</sub> = 0.0250] | 5377 [ <i>R</i> <sub>int</sub> = 0.0639, <i>R</i> <sub>sigma</sub> = 0.0223] | 17773 [ <i>R</i> <sub>int</sub> = 0.0631, <i>R</i> <sub>sigma</sub> = 0.0548] |
| Data/restraints/parameters                                   | 5642/1/229                                                                   | 5377/1/292                                                                   | 17773/1/293                                                                   |
| Goodness-of-fit on <i>F</i> <sup>2</sup>                     | 1.074                                                                        | 1.055                                                                        | 1.043                                                                         |
| Final <i>R</i> indexes [ <i>I</i> ≥ 2 $\sigma$ ( <i>I</i> )] | <i>R</i> <sub>1</sub> = 0.0171, <i>wR</i> <sub>2</sub> = 0.0319              | <i>R</i> <sub>1</sub> = 0.0276, <i>wR</i> <sub>2</sub> = 0.0615              | <i>R</i> <sub>1</sub> = 0.0368, <i>wR</i> <sub>2</sub> = 0.0819               |
| Final <i>R</i> indexes [all data]                            | <i>R</i> <sub>1</sub> = 0.0188, <i>wR</i> <sub>2</sub> = 0.0323              | <i>R</i> <sub>1</sub> = 0.0359, <i>wR</i> <sub>2</sub> = 0.0643              | <i>R</i> <sub>1</sub> = 0.0468, <i>wR</i> <sub>2</sub> = 0.0866               |
| Largest diff. peak/hole / e Å <sup>-3</sup>                  | 0.59/-0.67                                                                   | 0.84/-0.82                                                                   | 0.74/-0.99                                                                    |
| Flack parameter                                              | -0.011(2)                                                                    | —                                                                            | —                                                                             |

Table S10. Selected bond lengths for structures **1–2**.

| <b>1</b> |      |           | <b>2a</b> |      |            | <b>2b</b> |      |            |
|----------|------|-----------|-----------|------|------------|-----------|------|------------|
| Atom     | Atom | Length/Å  | Atom      | Atom | Length/Å   | Atom      | Atom | Length/Å   |
| Au1      | Cl1  | 2.2833(9) | Au1       | Cl1  | 2.2832(10) | Au1       | Cl1  | 2.2856(13) |
| Au1      | P1   | 2.2170(9) | Au1       | P1   | 2.2301(10) | Au1       | P1   | 2.2279(13) |
| S2       | N1   | 1.623(4)  | S2        | N1   | 1.609(5)   | S2        | N1   | 1.614(5)   |
| S2       | N3   | 1.619(3)  | S2        | N3   | 1.617(4)   | S2        | N3   | 1.616(4)   |
| P1       | N4   | 1.672(3)  | P1        | C7   | 1.853(4)   | P1        | C7   | 1.865(5)   |
| P1       | C7   | 1.806(4)  | P1        | C14  | 1.810(4)   | P1        | C14  | 1.818(6)   |
| P1       | C13  | 1.806(3)  | P1        | C20  | 1.808(4)   | P1        | C20  | 1.814(5)   |

Table S11. Selected bond angles for structures **1–2**.

| <b>1</b> |      |      |            | <b>2a</b> |      |      |            | <b>2b</b> |      |      |            |
|----------|------|------|------------|-----------|------|------|------------|-----------|------|------|------------|
| Atom     | Atom | Atom | Angle/°    | Atom      | Atom | Atom | Angle/°    | Atom      | Atom | Atom | Angle/°    |
| P1       | Au1  | Cl1  | 176.60(4)  | P1        | Au1  | Cl1  | 179.28(4)  | P1        | Au1  | Cl1  | 176.71(5)  |
| N3       | S2   | N1   | 100.95(16) | N1        | S2   | N3   | 101.5(2)   | N1        | S2   | N3   | 100.6(2)   |
| N4       | P1   | Au1  | 113.35(12) | C7        | P1   | Au1  | 110.92(13) | C7        | P1   | Au1  | 114.81(17) |
| N4       | P1   | C7   | 101.67(16) | C14       | P1   | Au1  | 114.21(14) | C14       | P1   | Au1  | 112.06(18) |
| N4       | P1   | C13  | 107.11(16) | C14       | P1   | C7   | 106.74(19) | C14       | P1   | C7   | 105.6(2)   |
| C7       | P1   | Au1  | 113.04(12) | C20       | P1   | Au1  | 112.76(14) | C20       | P1   | Au1  | 112.27(17) |
| C7       | P1   | C13  | 105.86(16) | C20       | P1   | C7   | 104.63(18) | C20       | P1   | C7   | 106.4(2)   |
| C13      | P1   | Au1  | 114.72(11) | C20       | P1   | C14  | 106.94(19) | C20       | P1   | C14  | 105.0(2)   |
| C2       | N1   | S2   | 106.5(3)   | C2        | N1   | S2   | 106.5(3)   | C2        | N1   | S2   | 107.1(4)   |
| C3       | N3   | S2   | 105.8(2)   | C3        | N3   | S2   | 105.1(3)   | C3        | N3   | S2   | 106.2(4)   |
| C4       | N4   | P1   | 125.4(2)   | N4        | C7   | P1   | 105.3(3)   | N4        | C7   | P1   | 108.2(4)   |
|          |      |      |            | C8        | C7   | P1   | 110.7(3)   | C8        | C7   | P1   | 111.7(3)   |
